# Supplementary material
Source: publisher figshare collection journal article supplement (https://tandf.figshare.com/ndownloader/files/12544151)
Supplement: Supplementary file 1 [file 12544151]

**Supplementary Table S1**. Xia’s test for substitution saturation: testing whether the observed Iss is significantly lower than Iss.c in the *Xylella fastidiosa* SNPs alignment. IssSym is Iss.c assuming a symmetrical topology. IssAsym is Iss.c assuming an asymmetrical topology.

| **Iss** | **Iss.cSym** | **T** | **DF** | **P** | **Iss.cAsym** | **T** | **DF** | **P** |
| --- | --- | --- | --- | --- | --- | --- | --- | --- |
| 0,39 | 0,82 | 490,29 | 11414 | 0,00 | 0,65 | 301,6 | 11414 | 0,00 |

*Note: two-tailed tests are used. Interpretation of results: Iss < Iss.c & significant difference = little saturation; Iss > Iss.c & significant difference = useless sequences; Iss < Iss.c & non-significant difference = substantial saturation; Iss > Iss.c & non-significant difference = very poor for phylogenetics.*
